# Supplementary material
Source: PubMed Central journal article supplement (PMC7232867)
Supplement: NIHMS1582287-supplement-1.pdf [file NIHMS1582287-supplement-1.pdf]

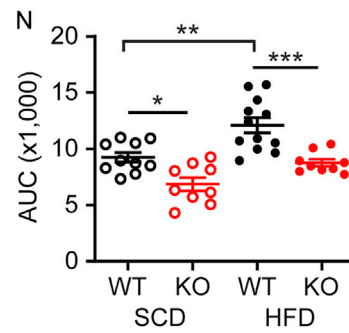

Figure S2N. Supportive Metabolic Tests Illustrating the Resistance to High-Fat Diet-Induced Metabolic Syndromes of *Drd1*-KO Mice. Related to Figure 2. (corrected)

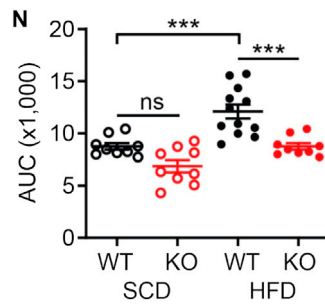

Figure S2N. Supportive Metabolic Tests Illustrating the Resistance to High-Fat Diet-Induced Metabolic Syndromes of *Drd1*-KO Mice. Related to Figure 2. (original)
